# Supplementary material for: Antigen-Specific Antibody Signature Is Associated with COVID-19 Outcome
Source: MDPI journal article supplement (doi:10.3390/v15041018), 2023-04-20

# Supplementary material

#### Supplementary Figure 1: Nucleocapsid proteins and antigenicity

Codon optimized full length nucleocapsid (N) protein of SARS-CoV-2 (Gen Bank QHD43423.2, residues: 1–419) and its domains N1 (residues: 1–182), N2 (residues: 115–304) and N3 (residues: 245–419), containing a polyhistidine (6x-His) tag at the N terminus of each protein was expressed in *Escherichia coli* strain BL21 and purified by affinity and size-exclusion chromatography as previously described. Western blotting (WB) was used to test the antigenicity of all the recombinant proteins. (A) A total of 1 µg of SARS-CoV full length N, N1, N2 and N3 proteins, with or without urea, were loaded onto 12% polyacrylamide gels and transferred to a nitrocellulose membrane using standard procedures. The membranes were blocked with 5% skimmed milk in phosphate buffer saline (PBS) for 1 hour at room temperature (RT). Blotted membranes were incubated for one hour at RT with 1:1000 dilution of primary antibodies. Next, RT-PCR positive COVID-19 patient plasma sample, pool of pre-pandemic COVID-19 negative plasma sample pool and anti-histidine tagged mouse monoclonal antibody (Sigma-Aldrich) with 5% milk in PBST (PBS + 0.05% Tween-20) was added to the membranes. After incubation, membranes were washed three times with PBST then incubated with goat anti-mouse IgG HRP-labelled (0.2 µg/mL KPL, Seracare, USA) or goat anti-human IgG HRP-labelled (0.1 µg/mL KPL, Seracare, USA) secondary antibody for one hour at RT. The membranes were again washed three times with PBST and the proteins were visualized using an enzymatic reaction by adding DAB (3,3',4,4' diaminobenzidine) (BioRad, EUA) and H<sub>2</sub>O<sub>2</sub> mixture for 5 minutes. Reaction was blocked by washing membrane five-times with distilled water and membranes were dried overnight to be photographed.

#### Supplementary Figure 2: Humoral response among COVID-19 patients

100ng of purified protein and 1:100 patient serum dilution was used in an indirect ELISA to estimate serum IgA, IgG and IgG-subclass response. Reactivity index (RI) values were calculated as a ratio between sample optical density and pre-pandemic negative samples. Each graph compares healthy individuals (n=13) and RT-PCR positive COVID-19 patients (n=128, samples n=211). Horizontal red line denotes the median antibody range.

#### Supplementary Figure 3: IgG4 response in COVID-19 patients

100ng of purified protein and 1:100 patient serum dilution was used in an indirect ELISA to estimate serum IgA, IgG and IgG-subclass response. Reactivity index (RI) values were calculated as a ratio between COVID-19 positive sample optical density and pre-pandemic negative samples. (A) Full-length and truncated SARS-CoV-2 nucleocapsid and spike proteins antibody binding is compared among COVID-19 patients (n=128). (B) Antibody reactivity is compared as a function of days after onset of symptoms. (C) Outpatients (n=80) and inpatients (n=48) or (D) discharged (n=24, samples n=59) and deceased (n=24, samples n=72) inpatients are compared. (E) IgG4 antibody response is compared between outpatients and inpatients  $\leq 7$  days or  $> 7$  days post infection. ANOVA test with Tukey's post hoc test was used to compare differences in the RI between different antigen groups. Two-way ANOVA with Šidák post hoc correction for multiple comparisons. \* $p < 0.05$ , \*\* $p < 0.01$ , \*\*\* $p < 0.001$ , \*\*\*\* $p < 0.0001$ .

#### Supplementary Figure 4: Robust humoral response is detected one week post SARS-CoV-2 infection.

100ng of purified full-length and truncated SARS-CoV-2 proteins were coated on ELISA plates and 1:100 patient serum dilution was used in an indirect ELISA to estimate serum IgA, IgG and IgG-subclass response. RT-PCR confirmed COVID-19 patient's outpatients (n=80) and inpatients (n=48, samples n=131) were compared  $\leq 7$  days or  $> 7$  days are the onset of symptoms. Horizontal red line denotes the median antibody range. Two-way ANOVA with Šidák post hoc correction for multiple comparisons. \* $p < 0.05$ , \*\* $p < 0.01$ , \*\*\* $p < 0.001$ , \*\*\*\* $p < 0.0001$ .

Supplementary Figure 5: Comparison of full-length nucleocapsid and truncated N2 protein reactivity among COVID-19 patients.

(A) Outpatient (n=5) and (B) inpatient (n=9) plasma samples were serially diluted and tested against 100ng of full-length nucleocapsid (N) or N2 protein in an indirect ELISA. Y-axis shows the optical density (OD) measured for these test samples against IgA or total IgG. Each coloured line represents one patient.

Supplementary Figure 6: Correlation between RBD-ACE2 inhibitory antibodies and SARS-CoV-2 antigen-specific response.

Inhibitory antibody levels were correlated with IgA, IgG and IgG-subclass reactivity against the full-length and truncated SARS-CoV-2 proteins. Each graph compares outpatient (n=70) and inpatient (n=41, samples n=120) with correlation and 95% CI. Inset depicts R squared values obtained by Spearman correlation.

Supplementary Figure 7: Correlation between neutralizing antibodies and SARS-CoV-2 antigen-specific response.

PRNT assay results were and correlated with IgA, IgG and IgG-subclass reactivity against the full-length and truncated SARS-CoV-2 proteins. Each graph compares all COVID-19 patients (n=54, samples n=82) with correlation and 95% CI. Inset depicts R squared values obtained by Spearman correlation.

Supplementary Figure 8: PRNT assay

Plasma samples were tested by PRNT in Vero cells after incubation with 300-plaque forming units (PFU). Percentage neutralization PRNT50 and PRNT90 represents the sample dilution corresponding 50% and 90% reduction in plaque formation compared to a control well inoculated with SARS-CoV-2 (without plasma). (A) Percentage neutralization was correlated with ACE2-RBD inhibitory antibody response among COVID-19 patient (n=54, samples n=82). (B) Outpatient (n=40) and inpatient (n=14) patient samples were serially diluted for the PRNT assay. Each data point represents the mean of all plasma samples for each group at each dilution level and error bars represent SD. (C and D) PRNT50 and PRNT90 values are compared to ACE2-RBD inhibitory antibody response. (E and F) days after onset of symptoms was compared to the PRNT50 and PRNT90 values for different study groups (outpatients n=40; discharged inpatients n=6, samples n=18; deceased inpatients n=8, samples n=24). Solid lines representing the tendency for the neutralizing antibodies was created by Fit Spline program GraphPad Prism software.

Supplementary Figure 9: Longitudinal humoral response dynamics in hospitalized patients.

100ng of purified full-length and truncated SARS-CoV-2 proteins were coated on ELISA plates and 1:100 patient serum dilution was used in an indirect ELISA to estimate serum IgA, IgG and IgG-subclass response. (A) RT-PCR confirmed hospitalized inpatient humoral response was compared in plasma samples collected longitudinally after hospital admission. Each line represents one patient and its antibody binding trajectories. Green colour denoted discharged inpatients (n=24) and pink denotes deceased inpatients (n=24). Solid line in black represents the tendency for the inpatients created by Fit Spline program GraphPad Prism software. X-axis denotes the RI and Y-axis days after onset of symptoms.

Supplementary Figure 10: Robust humoral response in severe patients despite low peripheral lymphocyte counts.

Lymphocyte data obtained by whole blood cell count was correlated with (A) anti-SARS-CoV-2 IgA or IgG response among COVID-19 patients (n=125, samples n=176) or (B) potentially neutralizing antibodies that block ACE2-RBD interactions. Each dot represents one patient sample. Lymphocyte levels are compared between (C) outpatients (n=78) and inpatients (n=47, samples n=98) or (D) discharged (n=23, samples n=40) and deceased (n=24, samples n=58) inpatients with blocking antibodies or days after onset of symptoms.

Supplementary Figure 11: Correlation matrix for study variables

A correlation analysis was performed for all variables described in the figure. Scale denotes spearman r value for each variable compared.

Supplementary Figure 12: Summary of serological response among COVID-19 patients.

(A) A principal component analysis was performed using all the available antibody reactivity variables, demographic, and clinical characteristics of the patients. (B) Coloured heat-map depicts relationship between patient characteristics, N3 and S1 binding antibodies and ACE2-RBD inhibitory antibodies.

Supplementary Figure 13: Longitudinal comparison of IgG subclass antibody response among COVID-19 patients.

Ratio of full-length and truncated N and S protein specific IgG subclass antibody response was compared days after onset of symptoms between outpatients (n=79) and inpatients (n=48, samples n=131) or hospitalized patients with discharged (n=24, samples n=59) or deceased (n=24, samples n=72) disease outcome. Solid lines represent the tendency for the antibody response created by Fit Spline program GraphPad Prism software.



Figure S1

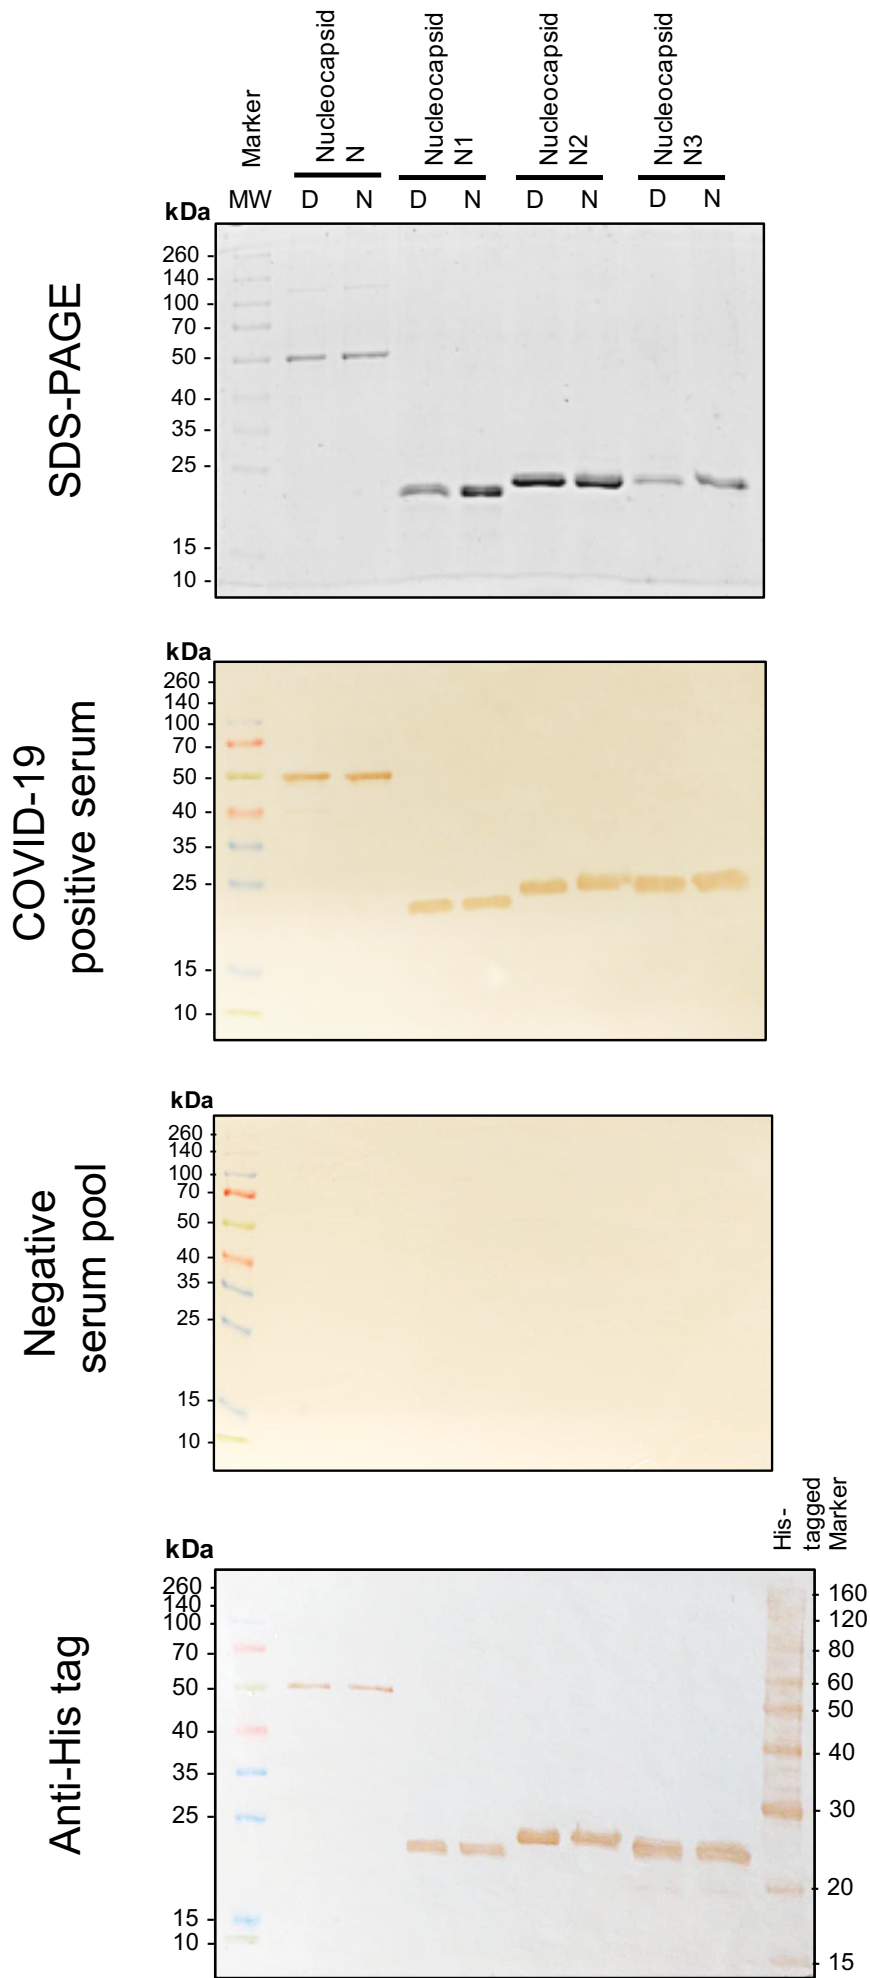

Figure S2

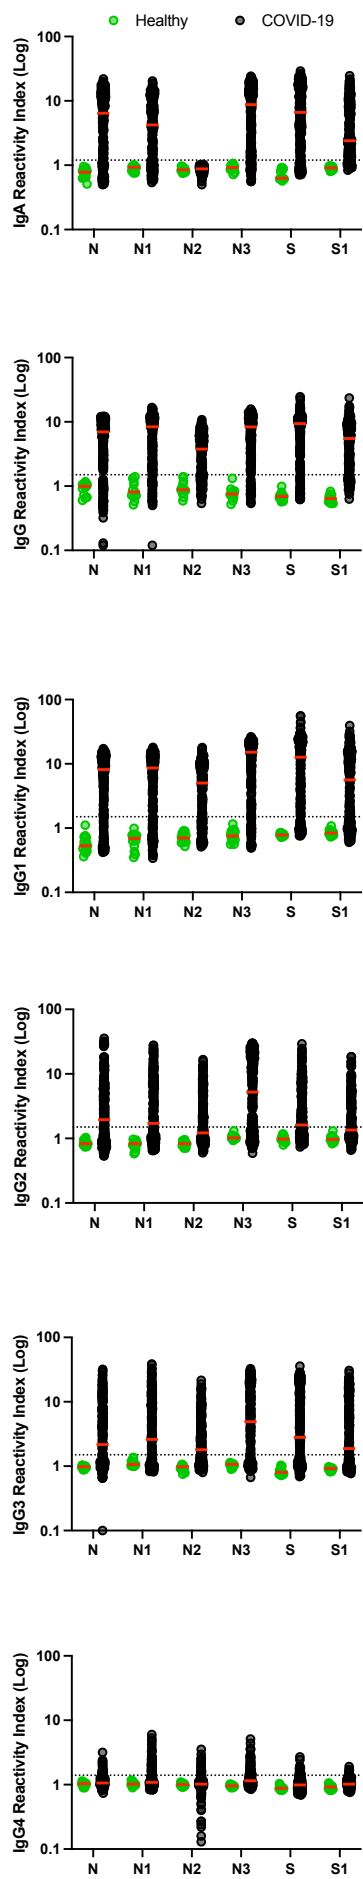

Figure S3

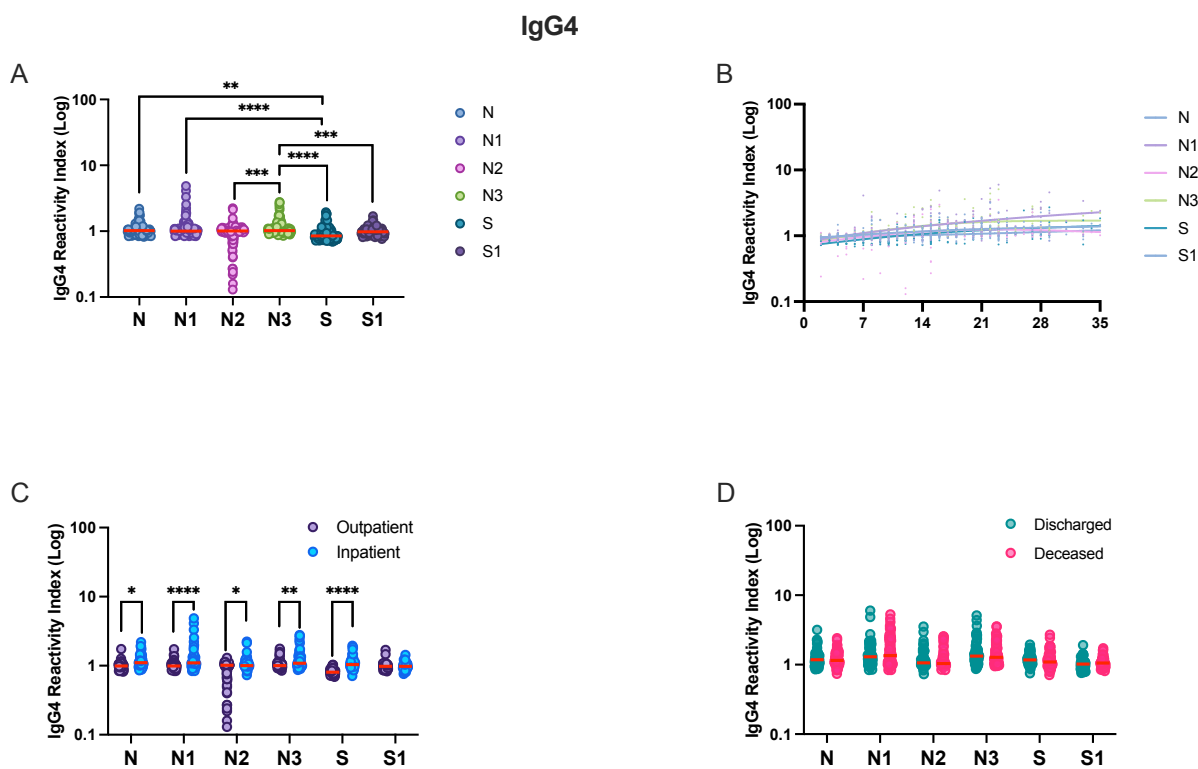

# Figure S4

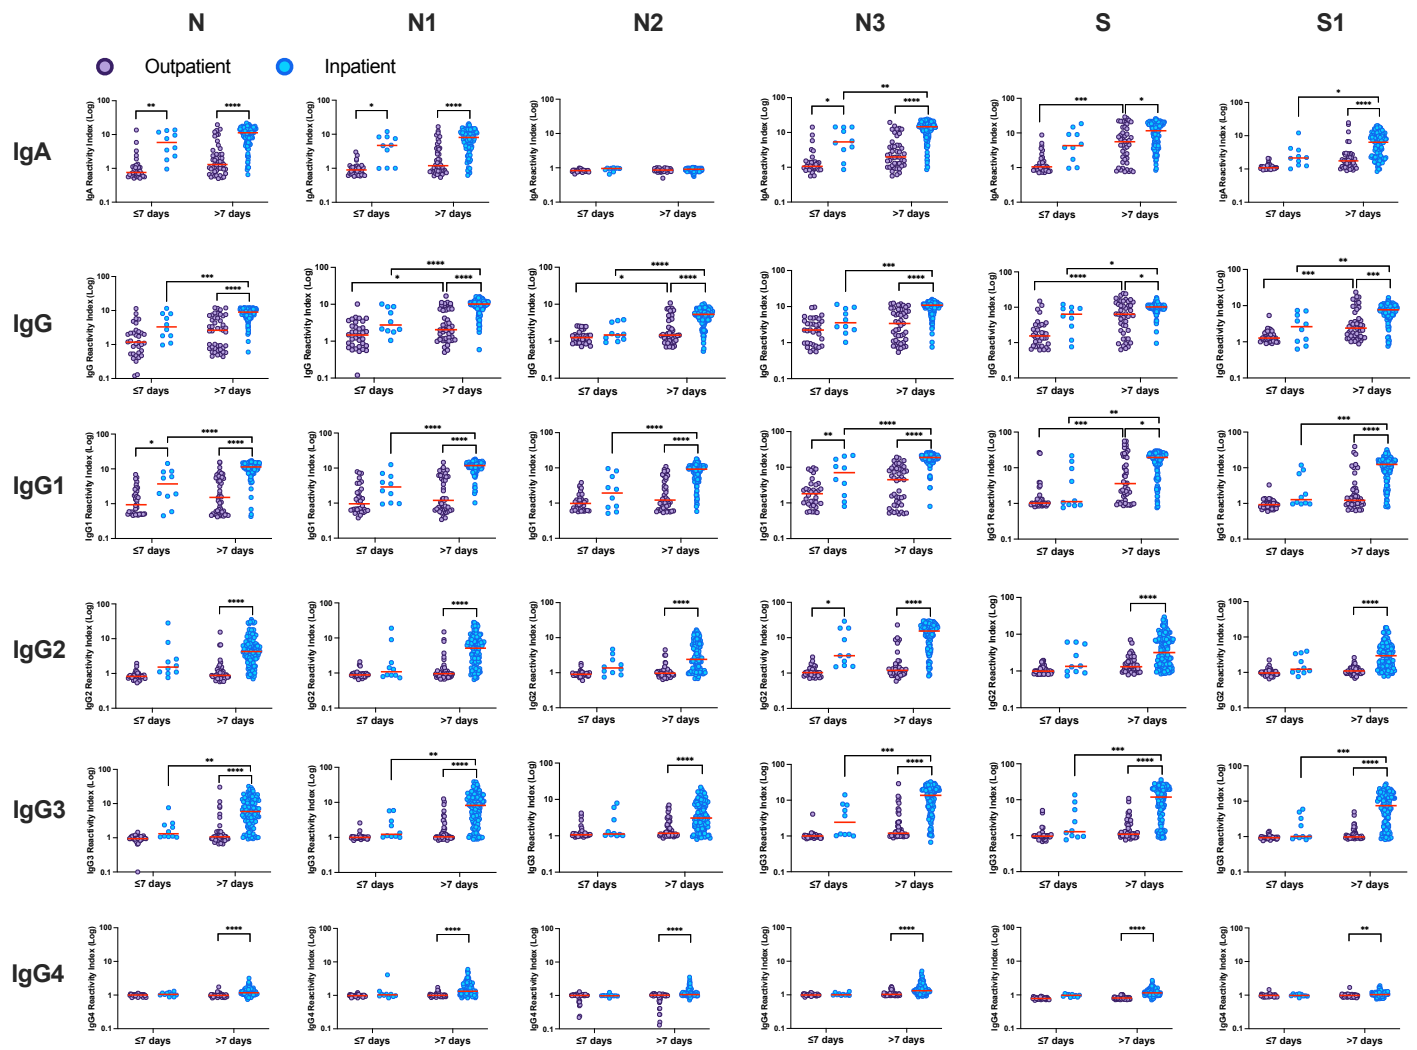

# Figure S5

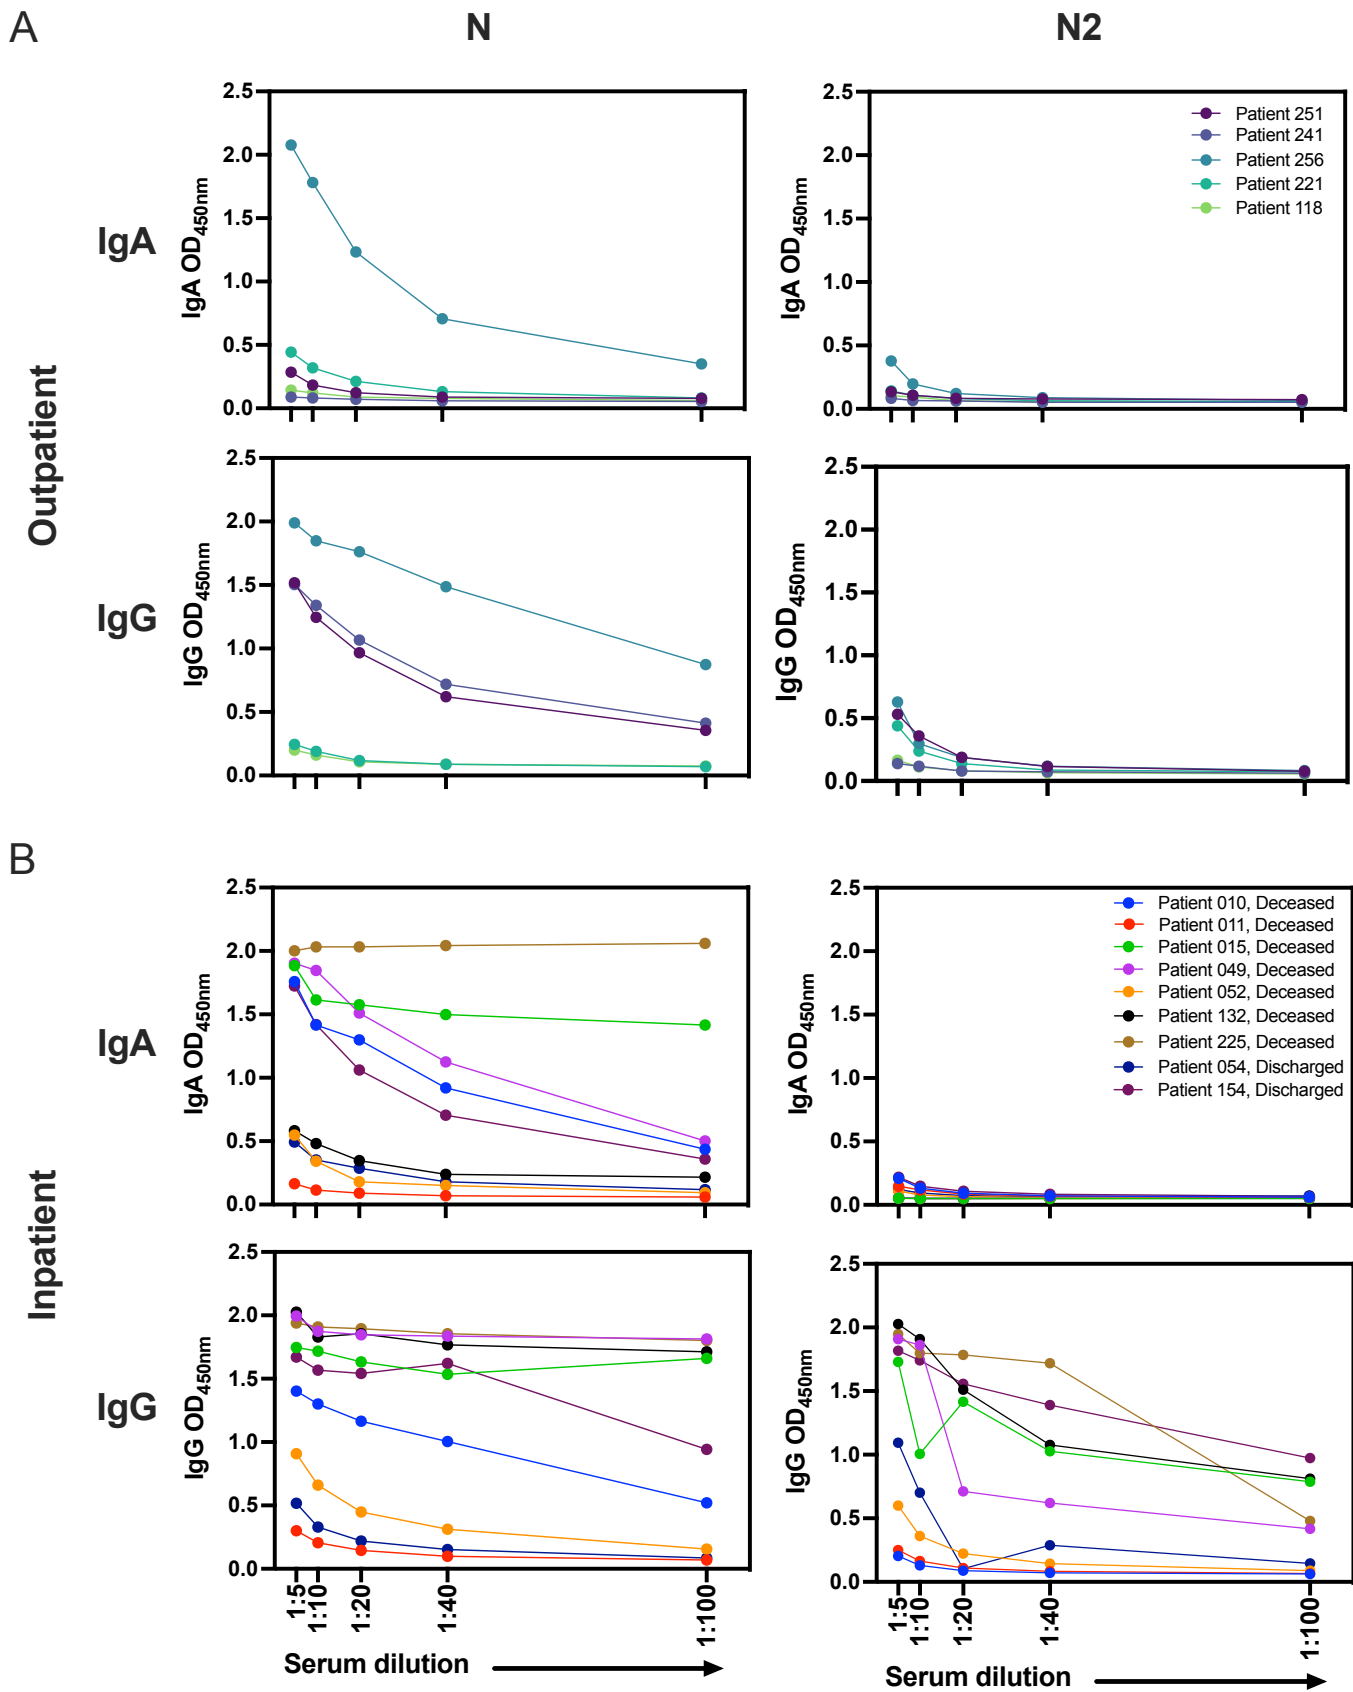

# Figure S6

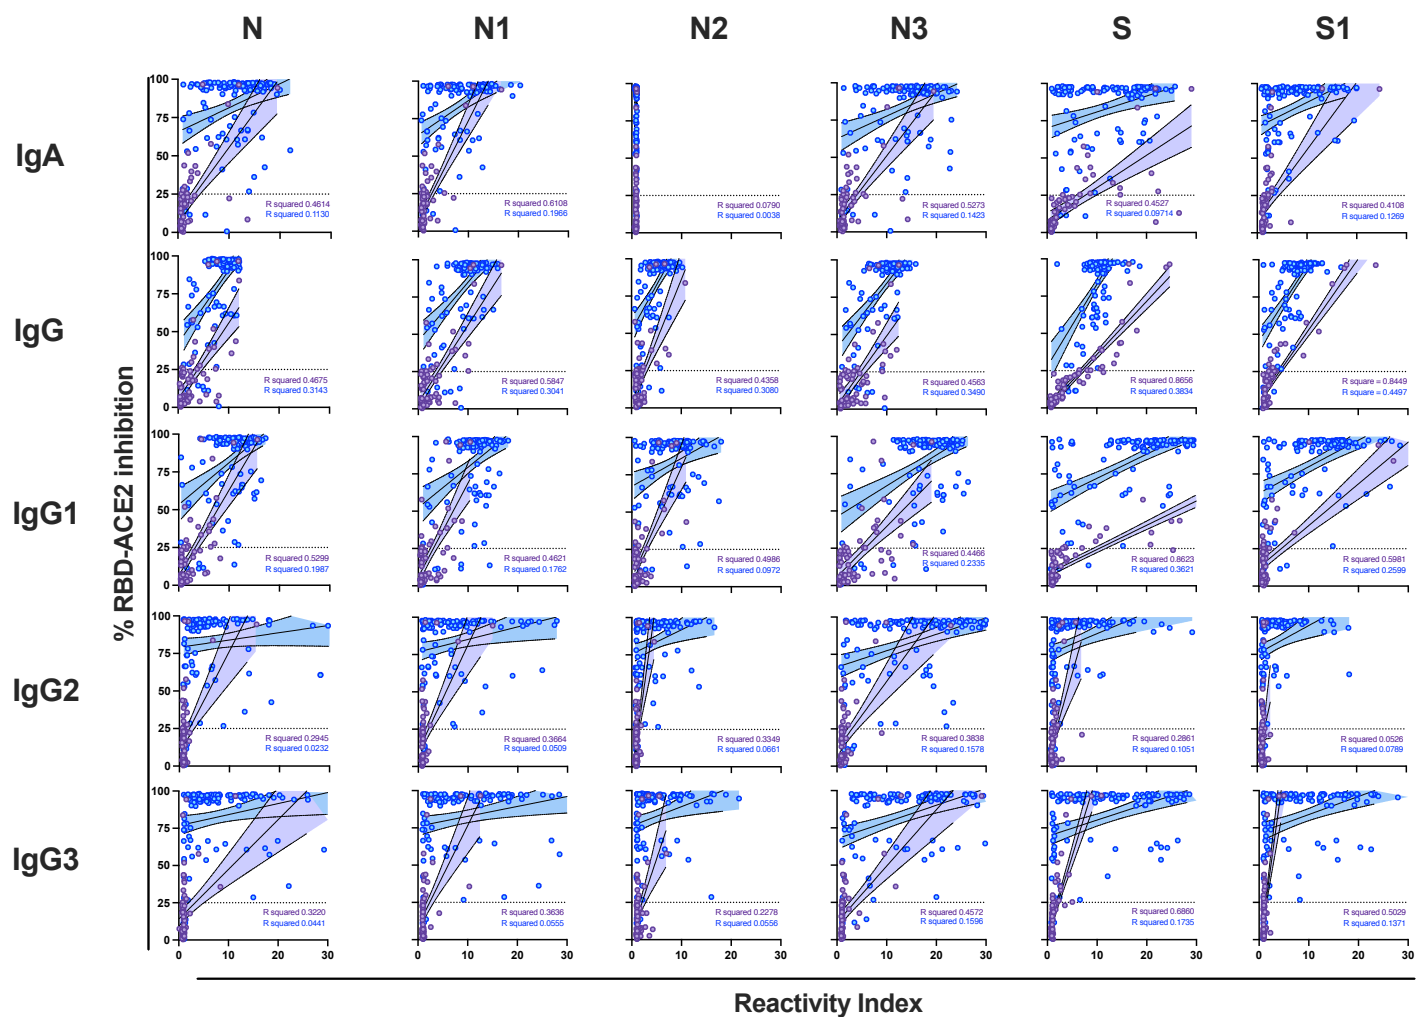

### Figure S7

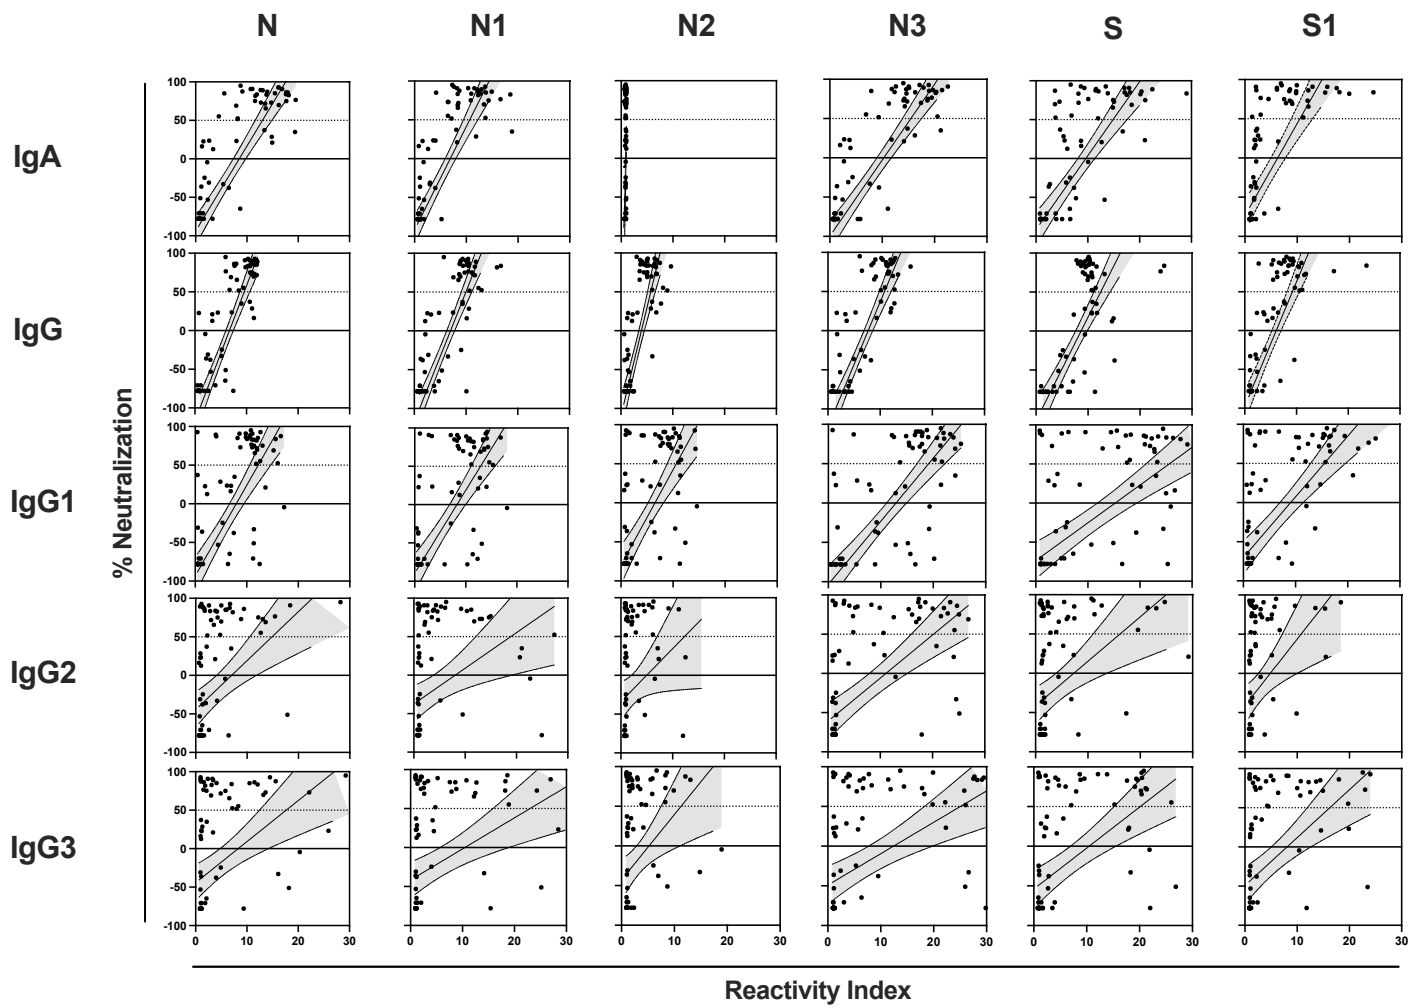

# Figure S8

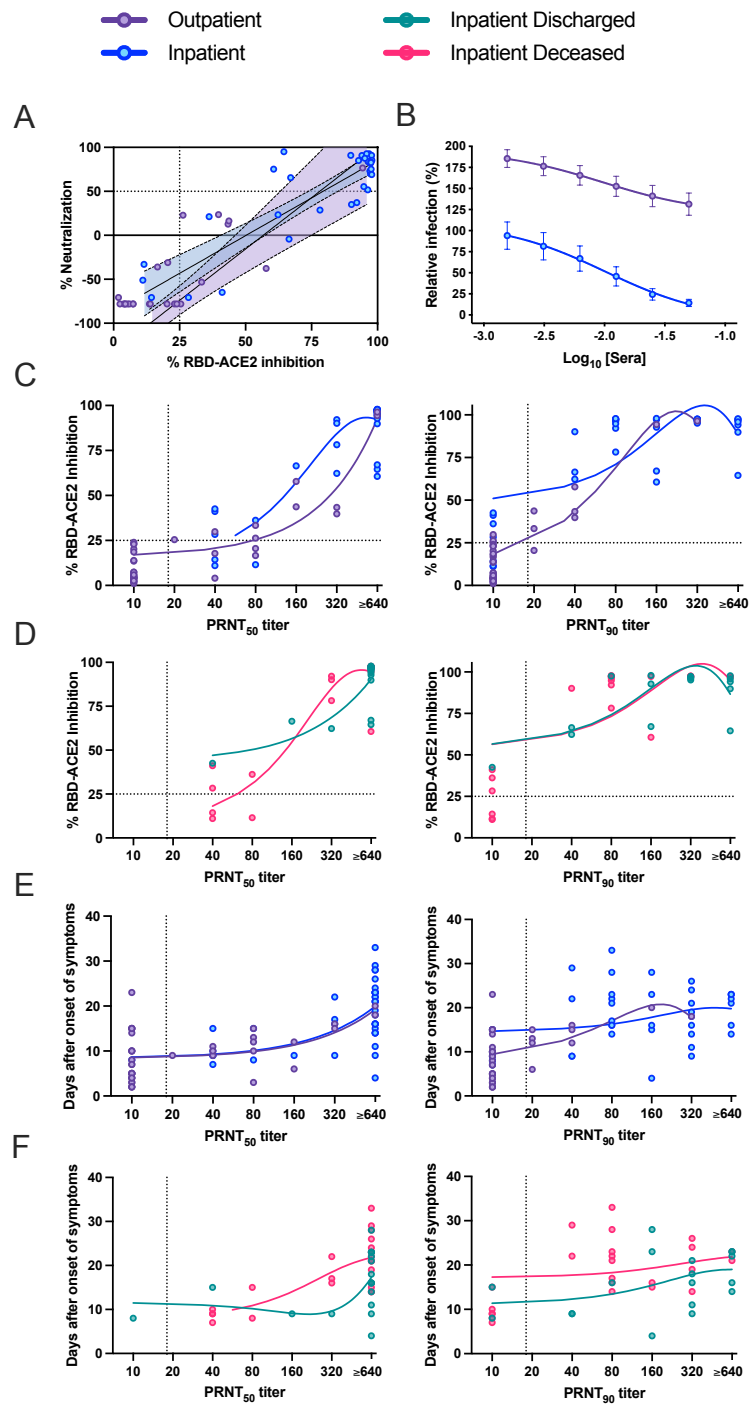



# Figure S9

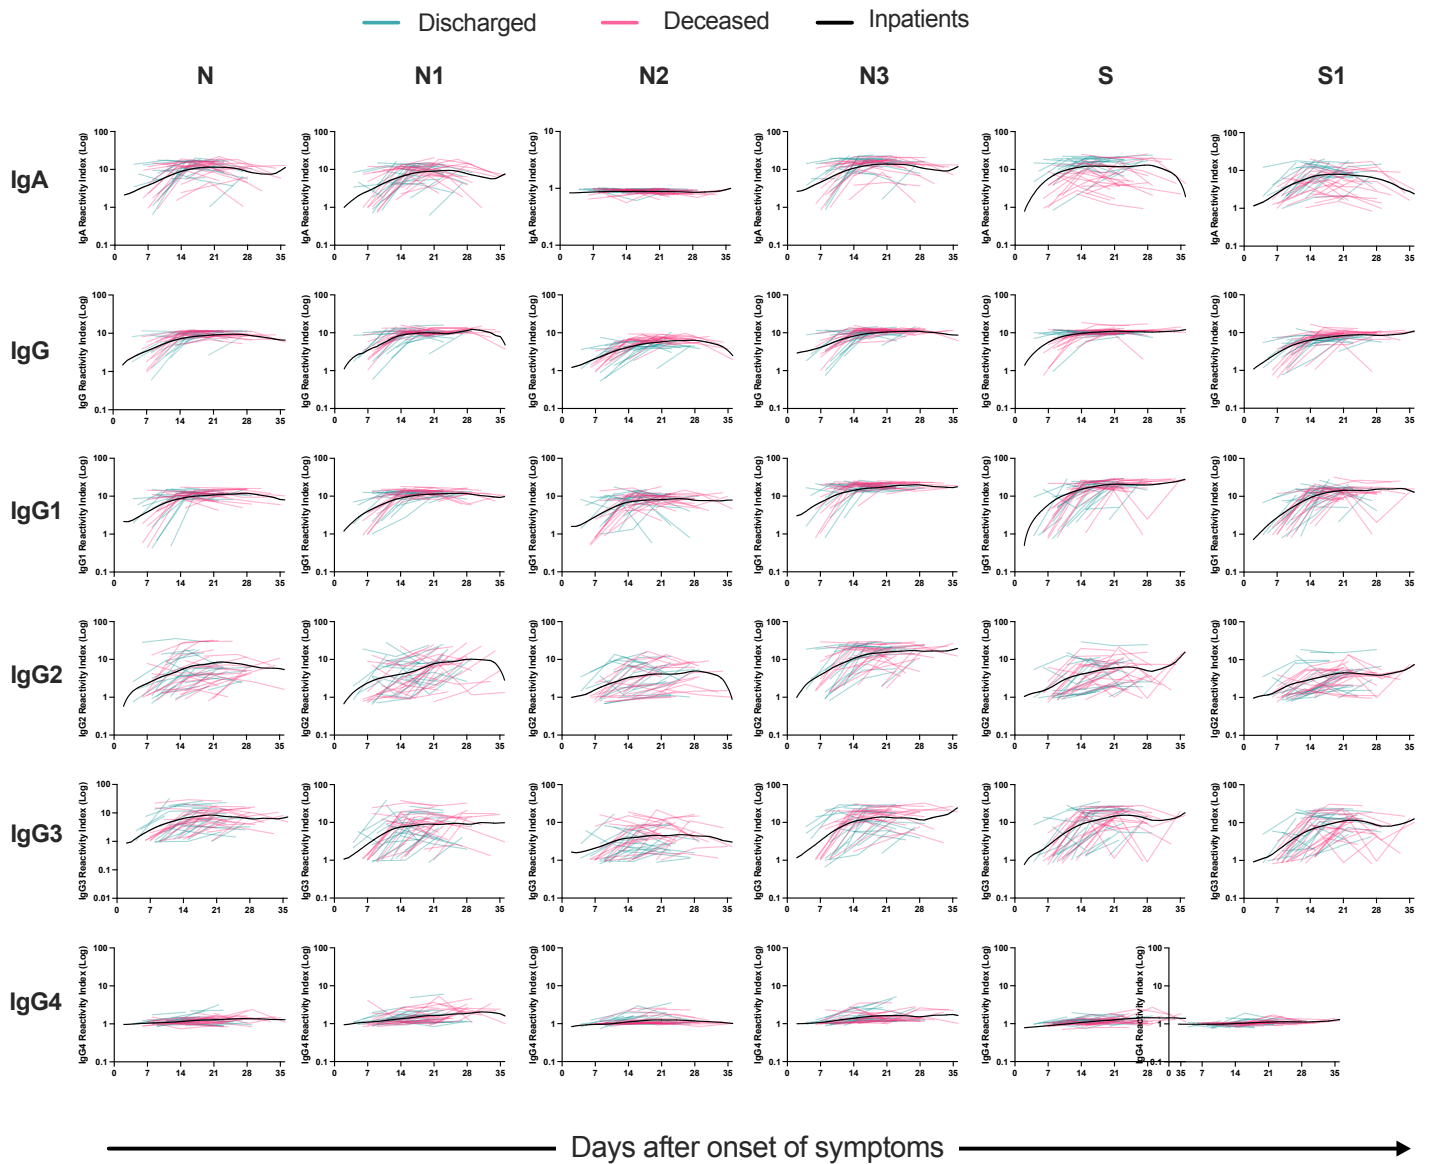

# Figure S10

A

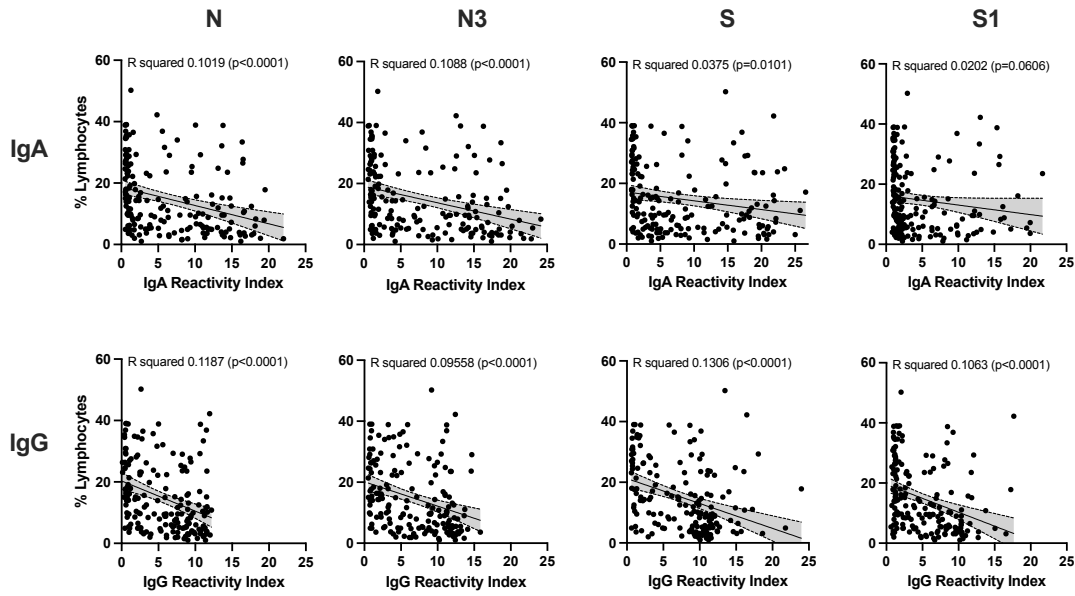

B

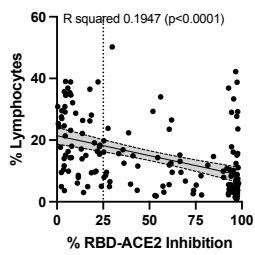

C

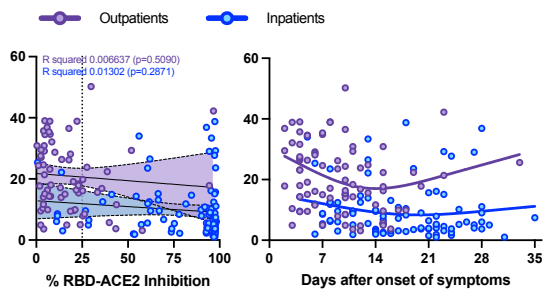

D

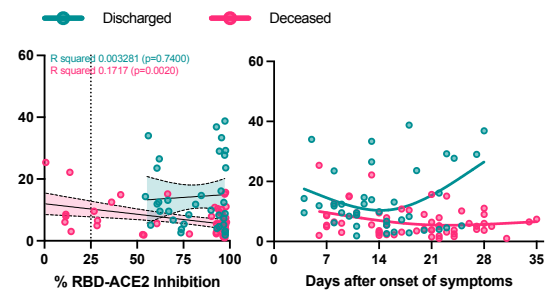

Figure S11

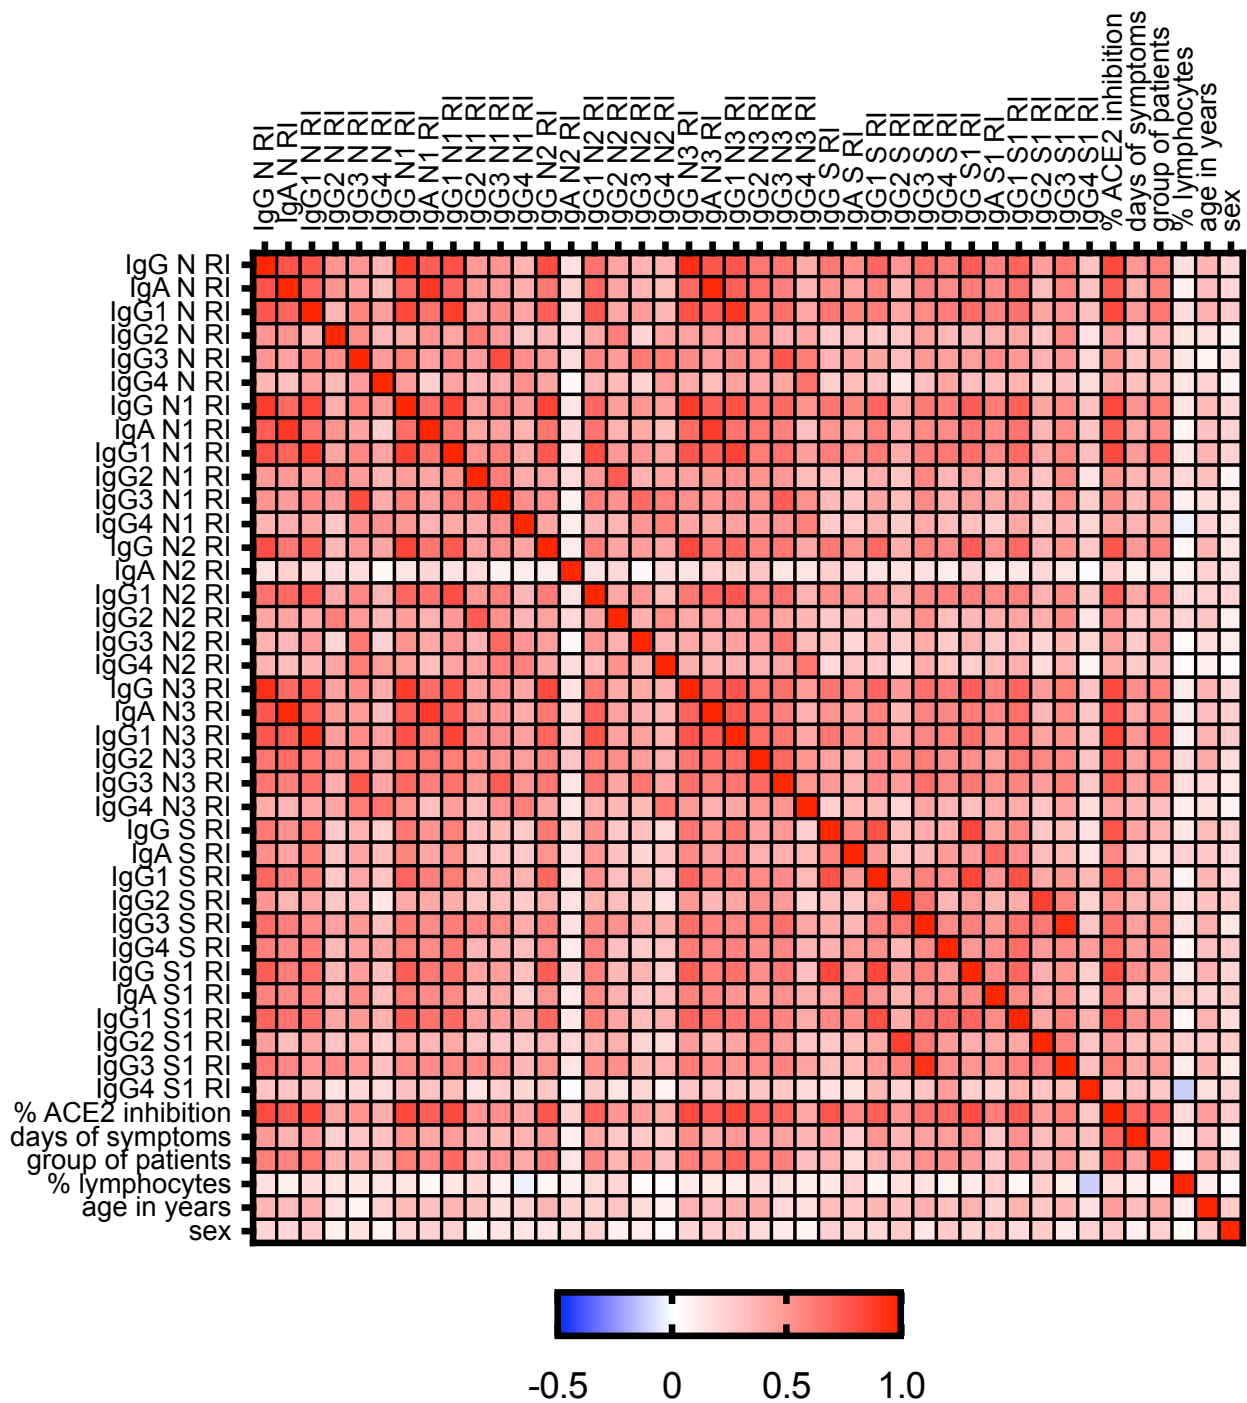

# Figure S12

A

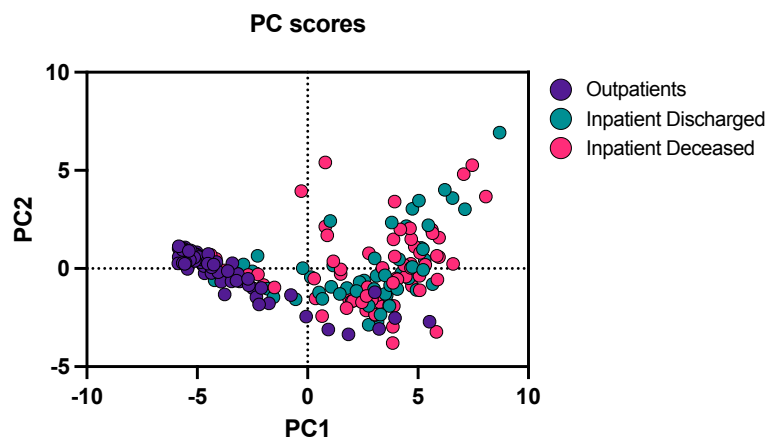

B

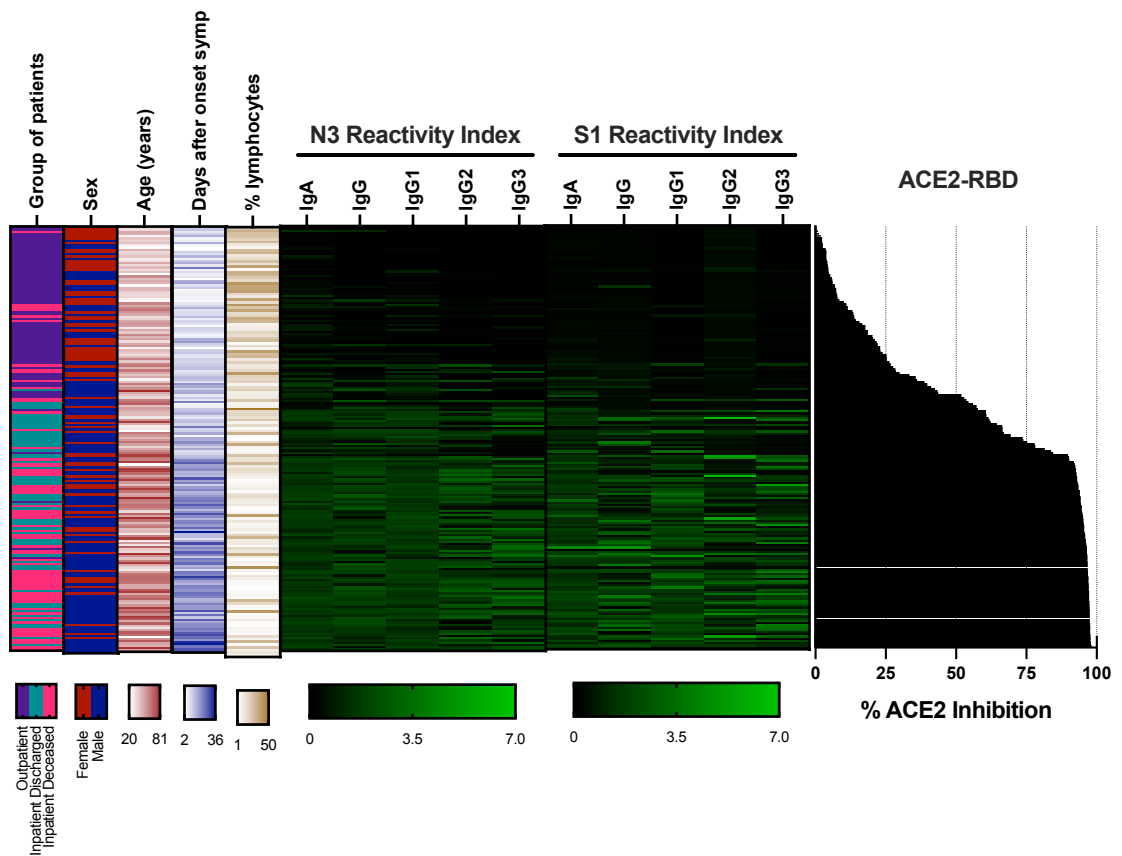

# Figure S13

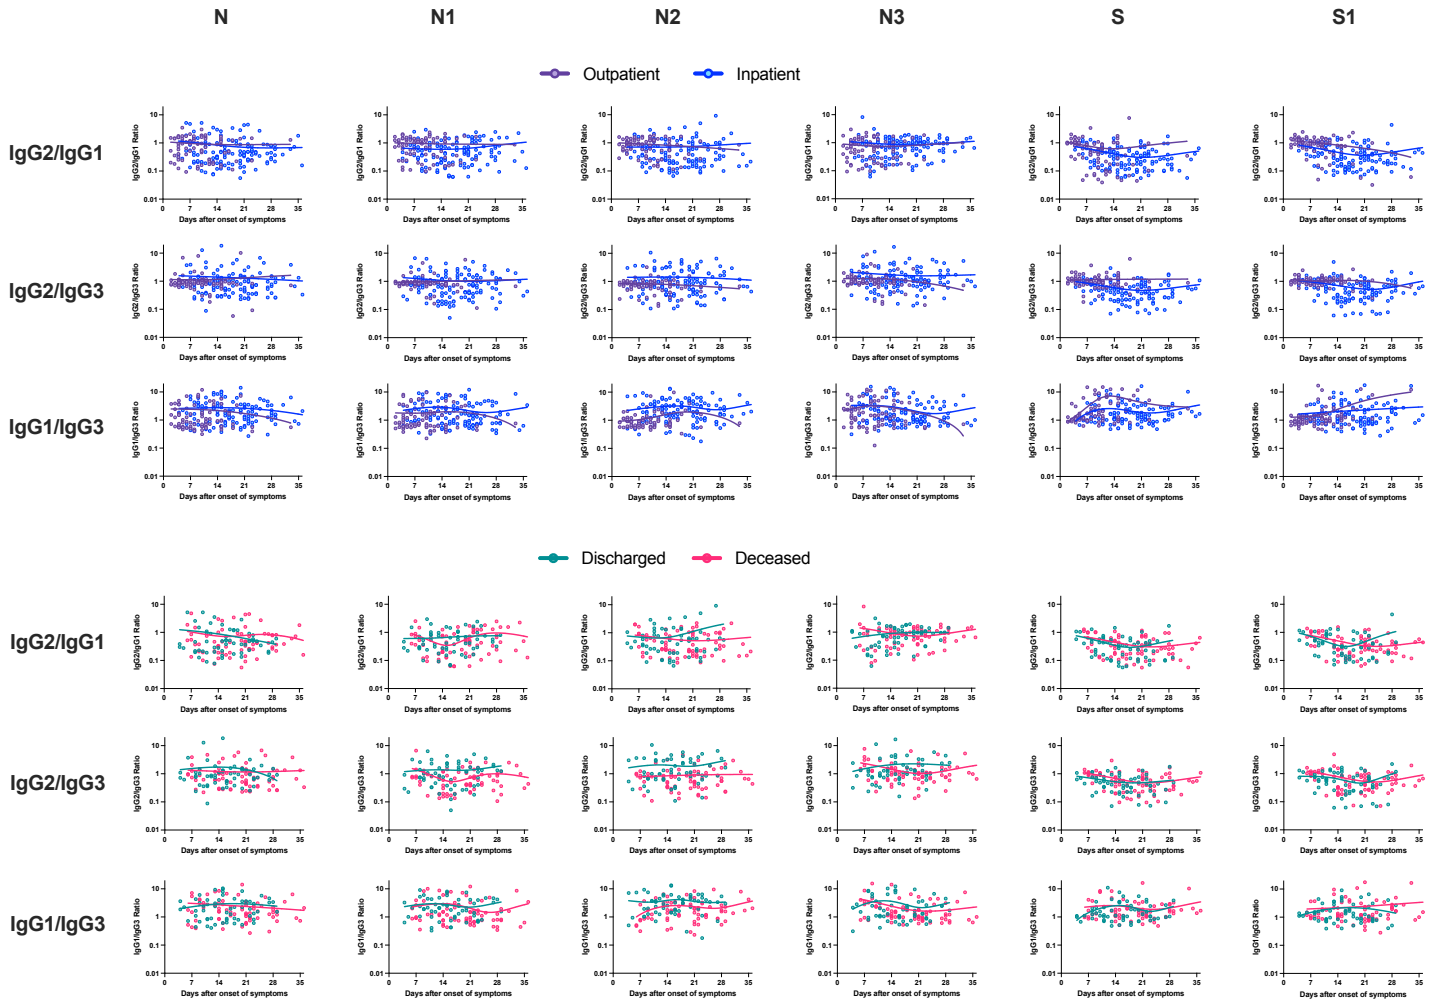

Supplement: s1 [file s1]
