# Supplementary material for: Antigen-Specific Antibody Signature Is Associated with COVID-19 Outcome
Source: MDPI journal article supplement (doi:10.3390/v15041018), 2023-04-20
Supplement: s1 [file s1]

**Supplementary Table 1. Demographic, clinical and hematological characteristics of COVID-19 patients.**

| Characteristics               |                               | Outpatients n=80   | Inpatients n=48     | P value | Inpatients Discharged<br>n=24 | Inpatients Deceased<br>n=24 | P value |
|-------------------------------|-------------------------------|--------------------|---------------------|---------|-------------------------------|-----------------------------|---------|
| Age median (IQR)              |                               | 40.5 (33 - 47)     | 55.5 (45 - 63)      |         | 52.5 (41.25 - 62.75)          | 58.5 (47.0 - 64.0)          |         |
| range                         |                               | 21 - 64            | 20 - 81             |         | 27 - 81                       | 20 - 79                     |         |
| Gender                        | Male                          | 36 (45)            | 34 (70.8)           |         | 17 (70.8)                     | 17 (70.8)                   |         |
|                               | Female                        | 44 (55)            | 14 (29.2)           |         | 7 (29.2)                      | 7 (29.2)                    |         |
| Race                          | Brown                         | 63 (78.7)          | 37 (77.1)           |         | 18 (75.0)                     | 19 (79.2)                   |         |
|                               | Black                         | 4 (5.0)            | 5 (10.4)            |         | 3 (12.5)                      | 2 (8.3)                     |         |
|                               | White                         | 9 (11.3)           | 6 (12.5)            |         | 3 (12.5)                      | 3 (12.5)                    |         |
|                               | East Asian                    | 4 (5.0)            | 0                   |         | 0                             | 0                           |         |
| BMI median (IQR)              |                               | 29.2 (25.9 - 33.1) | 29.25 (25.9 - 32.4) |         | 29.25 (25.75 - 32.38)         | 29.70 (26.05 - 35.00)       |         |
| BMI range (minimum- maximum)  |                               | 17.9 - 49.9        | 22.8 - 58.8         |         | 22.6 - 58.8                   | 23.3 - 43.4                 |         |
| Symptoms Days<br>median (IQR) |                               | 9 (5 - 33)         | 10.5 (8 - 22)       |         | 10.5 (8.0 - 13.0)             | 10.5 (7.25 - 15.0)          |         |
| Comorbidities*                | Chronic heart disease         | 3/80 (3.75)        | 6/48 (12.5)         | 0.0789  | 3/24 (12.5)                   | 3/24 (12.5)                 |         |
|                               | Hypertension                  | 23/80 (28.75)      | 21/48 (43.75)       | 0.5876  | 8/24 (33.3)                   | 13/24 (54.2)                |         |
|                               | Pulmonary disease             | 4/80 (5.0)         | 4/48 (8.3)          | 0.4721  | 3/24 (12.5)                   | 1/24 (4.17)                 |         |
|                               | Tuberculosis                  | 2/80 (2.5)         | 1/48 (2.1)          | 0.9999  | 1/24 (4.17)                   | 0/24 (0)                    |         |
|                               | Diabetes                      | 12/80 (15.0)       | 14/48 (29.16)       | 0.0698  | 8/24 (33.3)                   | 6/24 (25.0)                 |         |
|                               | Obesity                       | 36/80 (45.0)       | 21/48 (43.75)       | 0.9999  | 10/24 (41.7)                  | 11/24 (45.8)                |         |
|                               | Alcoholism                    | 48/80 (60.0)       | 20/48 (41.67)       | 0.8525  | 10/24 (41.7)                  | 10/24 (41.7)                |         |
|                               | HIV/AIDS                      | 1/80 (1.25)        | 0/48 (0)            | 0.9999  | 0/24 (0)                      | 0/24 (0)                    |         |
|                               | Kidney disease                | 5/80 (6.25)        | 0/48 (0)            | 0.1562  | 0/24 (0)                      | 0/24 (0)                    |         |
|                               | Neurological disease          | 8/80 (10.0)        | 3/48 (6.25)         | 0.5345  | 1/24 (4.17)                   | 2/24 (8.3)                  |         |
|                               | Rheumatic disease             | 5/80 (6.25)        | 5/48 (10.42)        | 0.5     | 5/24 (20.8)                   | 0/24 (0)                    |         |
|                               | Smoking habit                 | 21/80 (26.25)      | 14/48 (29.16)       | 0.8384  | 6/24 (25.0)                   | 8/24 (33.3)                 |         |
|                               | Liver disease                 | 3/80 (3.75)        | 0/48 (0)            | 0.2913  | 0/24 (0)                      | 0/24 (0)                    |         |
|                               | Chronic hematological disease | 4/80 (5.0)         | 0/48 (0)            | 0.2692  | 0/24 (0)                      | 0/24 (0)                    |         |
| Clinical<br>symptoms*         | Fever                         | 73/80 (91.25)      | 43/48 (89.6)        | 0.7623  | 22/24 (91.6)                  | 21/24 (87.5)                |         |
|                               | Dry cough                     | 71/80 (88.75)      | 42/48 (87.5)        | 0.9999  | 21/24 (87.5)                  | 21/24 (87.5)                |         |
|                               | Sore throat                   | 51/80 (63.75)      | 22/48 (45.8)        | 0.0649  | 12/24 (50.0)                  | 10/24 (41.6)                |         |
|                               | Nasal congestion              | 61/80 (76.25)      | 18/48 (37.5)        | 0.0001  | 10/24 (41.6)                  | 8/24 (33.3)                 |         |
|                               | Nasal discharge               | 49/80 (61.25)      | 19/48 (39.6)        | 0.0276  | 12/24 (50.0)                  | 7/24 (29.17)                |         |
|                               | Earache                       | 28/80 (35.0)       | 7/48 (14.6)         | 0.014   | 6/24 (25.0)                   | 1/24 (4.17)                 |         |
|                               | Wheezing                      | 31/80 (38.75)      | 17/48 (35.4)        | 0.8506  | 5/24 (20.8)                   | 12/24 (50.0)                |         |
|                               | Chest Pain                    | 62/80 (77.5)       | 31/48 (64.6)        | 0.1513  | 16/24 (66.7)                  | 15/24 (62.5)                |         |
|                               | Myalgia                       | 72/80 (90.0)       | 30/48 (62.5)        | 0.0005  | 18/24 (75.0)                  | 12/24 (50.0)                |         |
|                               | Arthralgia                    | 64/80 (80.0)       | 24/48 (50.0)        | 0.0007  | 13/24 (54.17)                 | 11/24 (45.8)                |         |
|                               | Fatigue                       | 75/80 (93.75)      | 42/48 (87.5)        | 0.3285  | 21/24 (87.5)                  | 21/24 (87.5)                |         |
|                               | Shortness of breathe          | 70/80 (87.5)       | 45/48 (93.7)        | 0.3683  | 22/24 (91.6)                  | 23/24 (95.8)                |         |
|                               | Intercostal circulation       | 41/80 (51.25)      | 20/48 (41.6)        | 0.3614  | 12/24 (50.0)                  | 8/24 (33.3)                 |         |
|                               | Nasal Wing Beating            | 23/80 (28.75)      | 12/48 (25.0)        | 0.687   | 8/24 (33.3)                   | 4/24 (16.67)                |         |
|                               | Anosmia                       | 66/80 (82.5)       | 28/48 (58.3)        | 0.0001  | 15/24 (62.5)                  | 13/24 (54.17)               |         |
|                               | Dysgeusia (loss of taste)     | 66/80 (82.5)       | 23/48 (47.9)        | 0.0001  | 15/24 (62.5)                  | 8/24 (33.3)                 |         |

|                                |                                                   |                        |                          |         |                       |                        |         |
|--------------------------------|---------------------------------------------------|------------------------|--------------------------|---------|-----------------------|------------------------|---------|
|                                | Dehydration                                       | 44/80 (55.0)           | 14/48 (29.2)             | 0.0058  | 7/24 (29.17)          | 7/24 (29.17)           |         |
|                                | Headache                                          | 72/80 (90.0)           | 35/48 (72.9)             | 0.0146  | 21/24 (87.5)          | 14/24 (58.3)           |         |
|                                | Chill                                             | 60/80 (75.0)           | 26/48 (54.2)             | 0.0197  | 15/24 (62.5)          | 11/24 (45.8)           |         |
|                                | Dizziness                                         | 51/80 (63.75)          | 22/48 (45.8)             | 0.0649  | 15/24 (62.5)          | 7/24 (29.17)           |         |
|                                | Convulsions                                       | 4/80 (5.0)             | 4/48 (8.3)               | 0.4721  | 2/24 (8.33)           | 2/24 (8.33)            |         |
|                                | Altered Consciousness                             | 19/80 (23.7)           | 5/48 (10.4)              | 0.0665  | 2/24 (8.33)           | 3/24 (12.5)            |         |
|                                | Abdominal pain                                    | 42/80 (52.5)           | 23/48 (47.9)             | 0.7154  | 14/24 (58.3)          | 9/24 (37.5)            |         |
|                                | Vomiting                                          | 15/80 (18.7)           | 14/48 (29.2)             | 0.195   | 7/24 (29.17)          | 7/24 (29.17)           |         |
|                                | Nausea                                            | 52/80 (65.0)           | 20/48 (41.6)             | 0.0163  | 11/24 (45.8)          | 9/24 (37.5)            |         |
|                                | Diarrhea                                          | 41/80 (51.2)           | 22/48 (45.8)             | 0.5876  | 13/24 (54.17)         | 9/24 (37.5)            |         |
|                                | Conjunctivitis                                    | 3/80 (3.75)            | 4/48 (8.3)               | 0.4237  | 1/24 (4.17)           | 3/24 (12.5)            |         |
|                                | Rash                                              | 8/80 (10.0)            | 1/48 (2.1)               | 0.1519  | 1/24 (4.17)           | 0/24 (0)               |         |
|                                | Lymphadenopathy                                   | 22/80 (27.5)           | 4/48 (8.3)               | 0.1978  | 0/24 (0)              | 4/24 (16.67)           |         |
|                                | Sputum                                            | 37/80 (46.2)           | 27/48 (56.2)             | 0.3614  | 13/24 (54.17)         | 14/24 (58.3)           |         |
|                                | Itching                                           | 11/80 (13.7)           | 1/48 (2.1)               | 0.0305  | 1/24 (4.17)           | 0/24 (0)               |         |
|                                | Skin Injuries                                     | 3/80 (3.75)            | 0/48 (0)                 | 0.2913  | 0/24 (0)              | 0/24 (0)               |         |
|                                | Bleeding (Hemorrhage)                             | 1/80 (1.25)            | 2/48 (4.2)               | 0.5557  | 1/24 (4.17)           | 1/24 (4.17)            |         |
| Blood count#,<br>mean (95% CI) | Hemoglobin (g/dL)                                 | 13.44 (12.95 – 13.94)  | 12.69 (12.13 – 13.25)    | 0.053   | 13.17 (12.50 – 13.85) | 12.22 (11.33 – 13.11)  | 0.087   |
|                                | Leukocytes (mm <sup>3</sup> )                     | 8.39 (7.54 – 9.24)     | 11.79 (9.93 – 13.64)     | 0.0002  | 10.62 (8.39 – 12.85)  | 12.91 (9.86 – 15.94)   | 0.2184  |
|                                | Lymphocytes (%)                                   | 21.17 (18.69 – 23.64)  | 10.15 (8.08 – 12.23)     | <0.0001 | 11.93 (8.67 – 15.19)  | 8.45 (5.79 – 11.11)    | 0.092   |
|                                | Neutrophils (%)                                   | 70.61 (67.49 – 73.72)  | 81.75 (77.87 – 85.63)    | <0.0001 | 81.28 (77.39 – 85.17) | 82.20 (75.25 – 89.16)  | 0.8146  |
|                                | Hematocrit (%)                                    | 46.87 (43.77 – 49.97)  | 39.51 (38.01 – 41.00)    | 0.0006  | 40.72 (38.96 – 42.49) | 38.34 (35.92 – 40.77)  | 0.1099  |
|                                | Platelets (10 <sup>3</sup> /mm <sup>3</sup> )     | 259.94 (240.2 – 279.7) | 301.04 (267.7 – 334.4)   | 0.025   | 301.7 (257.6 – 345.7) | 300.5 (247.1 – 353.8)  | 0.9718  |
|                                | ALT (U/L)                                         | 52.61 (44.30 – 60.91)  | 85.5 (62.34 – 108.70)    | 0.001   | 97.64 (62.39 – 132.9) | 69.32 (38.91 – 99.73)  | 0.2207  |
|                                | AST (U/L)                                         | 43.74 (37.76 – 49.71)  | 87.46 (57.49)            | <0.0001 | 77.16 (54.78 – 99.55) | 101.2 (31.88 – 170.5)  | 0.4260  |
|                                | Glucose (mg/dL)                                   | 173.14 (110.1 – 236.2) | 208.58 (173.7 – 243.4)   | 0.3775  | 214.4 (151.6 – 277.1) | 203.4 (161.7 – 245.2)  | 0.7559  |
|                                | Creatinine (mg/dL)                                | 3.6 (-1.74 – 8.94)     | 1.57 (1.15 – 1.99)       | 0.5719  | 1.22 (0.85 – 1.59)    | 1.90 (1.15 – 2.64)     | 0.1059  |
|                                | Urea (mg/dL)                                      | 27.92 (26.10 – 29.74)  | 56.04 (41.63 – 70.45)    | <0.0001 | 42.18 (28.33 – 56.03) | 69.27 (44.47 – 94.06)  | 0.0569  |
|                                | LDH (U/L)                                         | 441.32 (144.8 – 737.9) | 972.68 (619.9 – 1,326.0) | 0.1573  | 796.7 (648.8 – 944.6) | 1,149 (408.7 – 1,889)  | 0.3112  |
|                                | C-reactive protein (mg/dL)                        | 60.5 (0.1 – 120.9)     | 101.84 (76.87 – 126.8)   | 0.2028  | 94.20 (55.32 – 133.1) | 109.50 (74.99 – 144.0) | 0.5428  |
| Hospitalization#               | Symptoms days before hospitalization median (IQR) |                        | 8.0 (6.0 – 13.0)         |         | 8.0 (6.0 – 12.0)      | 8.5 (6.0 – 13.0)       | 0.3991  |
|                                | Number of days in hospital median (IQR)           |                        | 16.0 (13.0 – 23.75)      |         | 13.50 (11.0 – 23.0)   | 19.0 (14.25 – 24.50)   | 0.0711  |
|                                | Symptoms days until outcome median (IQR)          |                        | 28.0 (20.0 – 34.0)       |         | 24.0 (18.0 – 33.0)    | 29.50 (24.0 – 37.5)    | 0.0356  |
|                                | ICU                                               |                        | 29/48 (60.4)             |         | 5/24 (20.8)           | 24/24 (100)            | <0.0001 |
|                                | Number of days in ICU median (IQR)                |                        | 16.0 (11.5 – 21.5)       |         | 19.0 (8.5 – 27.0)     | 16.0 (12.25 – 20.0)    | 0.9259  |
|                                | Mechanical ventilation use*                       |                        | 28/48 (58.3)             |         | 5/24 (20.8)           | 23/24 (95.83)          | <0.0001 |
|                                | Number of days on ventilation median (IQR)        |                        | 16.0 (12.0 – 20.0)       |         | 12.0 (5.5 – 20.5)     | 17.0 (14.0 – 20.0)     | 0.1191  |

The data from comorbidities and clinical symptoms are represented as number of individuals with the finding in question among total and the relative percentage as the proportion of these individuals in the group. #P value from Unpaired T test. \*P value from Fisher's exact test. IQR: interquartile ranges; BMI: Body mass index; ALT: Alanine transaminase; AST: Aspartate transaminase; LDH: lactate dehydrogenase; ICU: Intensive Care Unit.

**Supplementary Table 2. Summary of patients and tests performed.**

| Method                | Group of patients                  | Number of patients    | Number of samples |
|-----------------------|------------------------------------|-----------------------|-------------------|
| ELISA*                | Healthy <sup>#</sup>               | 13                    | 224               |
|                       | Outpatients <sup>§</sup>           | 80                    |                   |
|                       | Inpatients Discharged <sup>^</sup> | 24 (59 <sup>@</sup> ) |                   |
|                       | Inpatients Deceased <sup>^</sup>   | 24 (72 <sup>@</sup> ) |                   |
|                       |                                    |                       |                   |
|                       |                                    |                       |                   |
| NeutraLISA            | Healthy <sup>#</sup>               | 13                    | 203               |
|                       | Outpatients <sup>§</sup>           | 70                    |                   |
|                       | Inpatients Discharged <sup>^</sup> | 20 (54 <sup>@</sup> ) |                   |
|                       | Inpatients Deceased <sup>^</sup>   | 21 (66 <sup>@</sup> ) |                   |
| PRNT <sup>&amp;</sup> | Outpatients <sup>§</sup>           | 40                    | 82                |
|                       | Inpatients Discharged <sup>^</sup> | 6 (18 <sup>@</sup> )  |                   |
|                       | Inpatients Deceased <sup>^</sup>   | 8 (24 <sup>@</sup> )  |                   |

\*All antibodies detection assays were assessed for N, N1, N2, N3, S and S1 antigens;

<sup>#</sup>People without symptoms and SARS-CoV-2 negative;

<sup>§</sup>Symptomatics, with or without fever and SARS-CoV-2 positive;

<sup>^</sup>Symptoms as dyspnea, respiratory discomfort, O2 saturation < 94%, Severe Acute Respiratory Syndrome and SARS-CoV-2 positive.

<sup>@</sup>Total number of samples, including longitudinal samples of patients

<sup>&</sup>Each sample was tested in duplicate with 2-fold serial dilutions
